# Supplementary material for: A Bayesian adaptive design for clinical trials in rare diseases
Source: PubMed Central journal article supplement (PMC5473477; doi:10.1016/j.csda.2016.09.006), 2016-09-28
Supplement: NIHMS71936-supplement-Appendix.pdf [file NIHMS71936-supplement-Appendix.pdf]

Appendix A

A.1. Backward induction algorithm

- If  $t = n$ , there is nothing to do because all  $n$  patients have already been treated and their outcomes observed. Thus,  $\mathcal{F}_n(\tilde{S}_{A,n}, \tilde{f}_{A,n}, \tilde{S}_{B,n}, \tilde{f}_{B,n}) = 0 \forall \tilde{S}_{A,n}, \tilde{f}_{A,n}, \tilde{S}_{B,n}, \tilde{f}_{B,n}$ .
- If  $t = n - 1$ , there is only one patient left to treat and interest is in determining which treatment to allocate to this patient  $\forall \tilde{S}_{A,n-1}, \tilde{f}_{A,n-1}, \tilde{S}_{B,n-1}, \tilde{f}_{B,n-1}$  that sum to  $n - 1$ . There are two possibilities:

- If treatment A is allocated to the remaining patient, then we compute the expectation

$$\mathcal{F}_{n-1}^A(\tilde{S}_{A,n-1}, \tilde{f}_{A,n-1}, \tilde{S}_{B,n-1}, \tilde{f}_{B,n-1}) = \frac{\tilde{S}_{A,n-1}}{\tilde{S}_{A,n-1} + \tilde{f}_{A,n-1}} \cdot 1 + \frac{\tilde{f}_{A,n-1}}{\tilde{S}_{A,n-1} + \tilde{f}_{A,n-1}} \cdot 0,$$

where  $\frac{\tilde{S}_{A,n-1}}{\tilde{S}_{A,n-1} + \tilde{f}_{A,n-1}}$  is the expectation of  $\theta_A$  with respect to a Beta( $\tilde{S}_{A,n-1}, \tilde{f}_{A,n-1}$ ) distribution, and  $\frac{\tilde{f}_{A,n-1}}{\tilde{S}_{A,n-1} + \tilde{f}_{A,n-1}}$  is the probability of a failure if treatment A is allocated.

- Alternatively, if treatment B is allocated to the remaining patient, then we compute the expectation

$$\mathcal{F}_{n-1}^B(\tilde{S}_{A,n-1}, \tilde{f}_{A,n-1}, \tilde{S}_{B,n-1}, \tilde{f}_{B,n-1}) = \frac{\tilde{S}_{B,n-1}}{\tilde{S}_{B,n-1} + \tilde{f}_{B,n-1}} \cdot 1 + \frac{\tilde{f}_{B,n-1}}{\tilde{S}_{B,n-1} + \tilde{f}_{B,n-1}} \cdot 0,$$

where  $\frac{\tilde{S}_{B,n-1}}{\tilde{S}_{B,n-1} + \tilde{f}_{B,n-1}}$  is the expectation of  $\theta_B$  with respect to a Beta( $\tilde{S}_{B,n-1}, \tilde{f}_{B,n-1}$ ) distribution, and  $\frac{\tilde{f}_{B,n-1}}{\tilde{S}_{B,n-1} + \tilde{f}_{B,n-1}}$  is the probability of a failure if treatment B is allocated.

Interest is in choosing the optimal allocation such that

$$\mathcal{F}_{n-1}(\tilde{S}_{A,n-1}, \tilde{f}_{A,n-1}, \tilde{S}_{B,n-1}, \tilde{f}_{B,n-1}) = \max\{\mathcal{F}_{n-1}^A(\tilde{S}_{A,n-1}, \tilde{f}_{A,n-1}, \tilde{S}_{B,n-1}, \tilde{f}_{B,n-1}), \mathcal{F}_{n-1}^B(\tilde{S}_{A,n-1}, \tilde{f}_{A,n-1}, \tilde{S}_{B,n-1}, \tilde{f}_{B,n-1})\}.$$

Thus, if  $\mathcal{F}_{n-1}^A(\tilde{S}_{A,n-1}, \tilde{f}_{A,n-1}, \tilde{S}_{B,n-1}, \tilde{f}_{B,n-1}) > \mathcal{F}_{n-1}^B(\tilde{S}_{A,n-1}, \tilde{f}_{A,n-1}, \tilde{S}_{B,n-1}, \tilde{f}_{B,n-1})$ , then it is optimal to allocate the remaining patient to treatment A, and vice versa. If they are equal, then both treatments are optimal choices.

- The next step is if  $t = n - 2$ , i.e. when there are two remaining patients to be allocated. To determine which treatment to allocate to patient  $n - 1$ , there are two possibilities:

- If treatment A is allocated to patient  $n - 2$ , then we compute the expectation

$$\begin{aligned} \mathcal{F}_{n-2}^A(\tilde{S}_{A,n-2}, \tilde{f}_{A,n-2}, \tilde{S}_{B,n-2}, \tilde{f}_{B,n-2}) &= \frac{\tilde{S}_{A,n-2}}{\tilde{S}_{A,n-2} + \tilde{f}_{A,n-2}} \cdot (1 + \mathcal{F}_{n-1}(\tilde{S}_{A,n-2} + 1, \tilde{f}_{A,n-2}, \tilde{S}_{B,n-2}, \tilde{f}_{B,n-2})) \\ &\quad + \frac{\tilde{f}_{A,n-2}}{\tilde{S}_{A,n-2} + \tilde{f}_{A,n-2}} \cdot (0 + \mathcal{F}_{n-1}(\tilde{S}_{A,n-2}, \tilde{f}_{A,n-2} + 1, \tilde{S}_{B,n-2}, \tilde{f}_{B,n-2})). \end{aligned}$$

- Similarly, if treatment B is allocated, then we compute the expectation

$$\begin{aligned} \mathcal{F}_{n-2}^B(\tilde{S}_{A,n-2}, \tilde{f}_{A,n-2}, \tilde{S}_{B,n-2}, \tilde{f}_{B,n-2}) &= \frac{\tilde{S}_{B,n-2}}{\tilde{S}_{B,n-2} + \tilde{f}_{B,n-2}} \cdot (1 + \mathcal{F}_{n-1}(\tilde{S}_{A,n-2}, \tilde{f}_{A,n-2}, \tilde{S}_{B,n-2} + 1, \tilde{f}_{B,n-2})) \\ &\quad + \frac{\tilde{f}_{B,n-2}}{\tilde{S}_{B,n-2} + \tilde{f}_{B,n-2}} \cdot (0 + \mathcal{F}_{n-1}(\tilde{S}_{A,n-2}, \tilde{f}_{A,n-2}, \tilde{S}_{B,n-2}, \tilde{f}_{B,n-2} + 1)). \end{aligned}$$

- *et cetera.*

These steps are just iterations, and can be expressed more succinctly in the general form as follows.

If treatment A is allocated to the next patient, then the expected number of successes for patients  $t + 1$  through  $n$  under an optimal policy is

$$\begin{aligned} \mathcal{F}_t^A(\tilde{S}_{A,t}, \tilde{f}_{A,t}, \tilde{S}_{B,t}, \tilde{f}_{B,t}) &= \frac{\tilde{S}_{A,t}}{\tilde{S}_{A,t} + \tilde{f}_{A,t}} \cdot (1 + \mathcal{F}_{t+1}(\tilde{S}_{A,t} + 1, \tilde{f}_{A,t}, \tilde{S}_{B,t}, \tilde{f}_{B,t})) \\ &\quad + \frac{\tilde{f}_{A,t}}{\tilde{S}_{A,t} + \tilde{f}_{A,t}} \cdot \mathcal{F}_{t+1}(\tilde{S}_{A,t}, \tilde{f}_{A,t} + 1, \tilde{S}_{B,t}, \tilde{f}_{B,t}). \end{aligned}$$

On the other hand, if treatment B is allocated to the next patient, then the expected total reward under an optimal policy is

$$\begin{aligned} \mathcal{F}_t^B(\tilde{S}_{A,t}, \tilde{f}_{A,t}, \tilde{S}_{B,t}, \tilde{f}_{B,t}) &= \frac{\tilde{S}_{B,t}}{\tilde{S}_{B,t} + \tilde{f}_{B,t}} \cdot (1 + \mathcal{F}_{t+1}(\tilde{S}_{A,t}, \tilde{f}_{A,t}, \tilde{S}_{B,t} + 1, \tilde{f}_{B,t})) \\ &\quad + \frac{\tilde{f}_{B,t}}{\tilde{S}_{B,t} + \tilde{f}_{B,t}} \cdot \mathcal{F}_{t+1}(\tilde{S}_{A,t}, \tilde{f}_{A,t}, \tilde{S}_{B,t}, \tilde{f}_{B,t} + 1). \end{aligned}$$

Therefore,  $\mathcal{F}$  satisfies the recurrence

$$\mathcal{F}_t(\tilde{S}_{A,t}, \tilde{f}_{A,t}, \tilde{S}_{B,t}, \tilde{f}_{B,t}) = \max\{\mathcal{F}_t^A(\tilde{S}_{A,t}, \tilde{f}_{A,t}, \tilde{S}_{B,t}, \tilde{f}_{B,t}), \mathcal{F}_t^B(\tilde{S}_{A,t}, \tilde{f}_{A,t}, \tilde{S}_{B,t}, \tilde{f}_{B,t})\}.$$

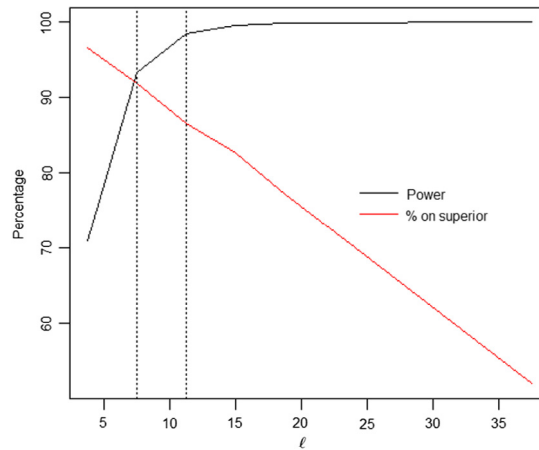

**Fig. A.8.** The effect of changing the degree of constraining,  $\ell$ , on the power and percentage of patients on the superior treatment when  $\theta_A = 0.2$  and  $\theta_B = 0.8$  for the constrained DP design (without randomisation). The left and right dashed vertical lines correspond to  $\ell = 0.10n$  and  $\ell = 0.15n$  respectively, where  $n = 75$  in this case.

**Table A.2**

Expected proportion of successes (EPS), run time in minutes (m) and seconds (s) and RAM memory requirements of the DP design (with uniform priors) on a standard laptop.

| $n$ | EPS     | Run time  | RAM      |
|-----|---------|-----------|----------|
| 10  | 0.60218 | 0.01 s    | 0.1 MB   |
| 30  | 0.63066 | 1 s       | 6.2 MB   |
| 50  | 0.63993 | 6 s       | 47.7 MB  |
| 70  | 0.64485 | 24 s      | 183.2 MB |
| 90  | 0.64799 | 1 m:04 s  | 0.56 GB  |
| 110 | 0.65020 | 2 m:22 s  | 1.1 GB   |
| 130 | 0.65186 | 4 m:37 s  | 2.1 GB   |
| 150 | 0.65316 | 8 m:03 s  | 3.86 GB  |
| 200 | 0.65547 | 25 m:20 s | 11.9 GB  |

**Table A.3**

The effect of changing the degree of randomisation,  $p$ , on the performance measures when  $n = 75$  and  $\theta_A = \theta_B = 0.2$  for the RDP design (without the constraint).

| $p$ | Bias   | MSE   | Type I error | EPS   | % on superior |
|-----|--------|-------|--------------|-------|---------------|
| 0.5 | 0.000  | 0.004 | 0.035        | 0.200 | 50.0          |
| 0.6 | -0.002 | 0.004 | 0.034        | 0.200 | 50.1          |
| 0.7 | -0.001 | 0.005 | 0.027        | 0.200 | 50.2          |
| 0.8 | 0.000  | 0.005 | 0.022        | 0.200 | 50.0          |
| 0.9 | 0.000  | 0.006 | 0.008        | 0.200 | 50.2          |
| 1.0 | 0.001  | 0.008 | 0.000        | 0.200 | 49.7          |

Table A.2 illustrates the computational speed of the backwards induction algorithm to compute the allocation policy of the DP design on a standard laptop with 16 GB of RAM. The maximum trial size that can be computed on a standard laptop using R is 215. Although trials of sizes larger than 215 are very unlikely to occur in a rare disease context, computations of the DP design are feasible on a standard performance workstation (1 TB of RAM) for  $215 < n < 600$ . Trials of a size up to 3500 patients would be feasible with today’s number #1 supercomputer (with 1.3 PB of RAM).

A.2. Choosing the degree of constraining,  $\ell$

Fig. A.8 illustrates the non-linearity of the power, based on which we recommend  $\ell = 0.15n$  in our proposed CRDP design.

A.3. Choosing the degree of randomisation,  $p$

Tables A.3, A.4, A.5, and A.6 illustrate the effect of randomisation, based on which we recommend  $p = 0.9$  in our proposed CRDP design.

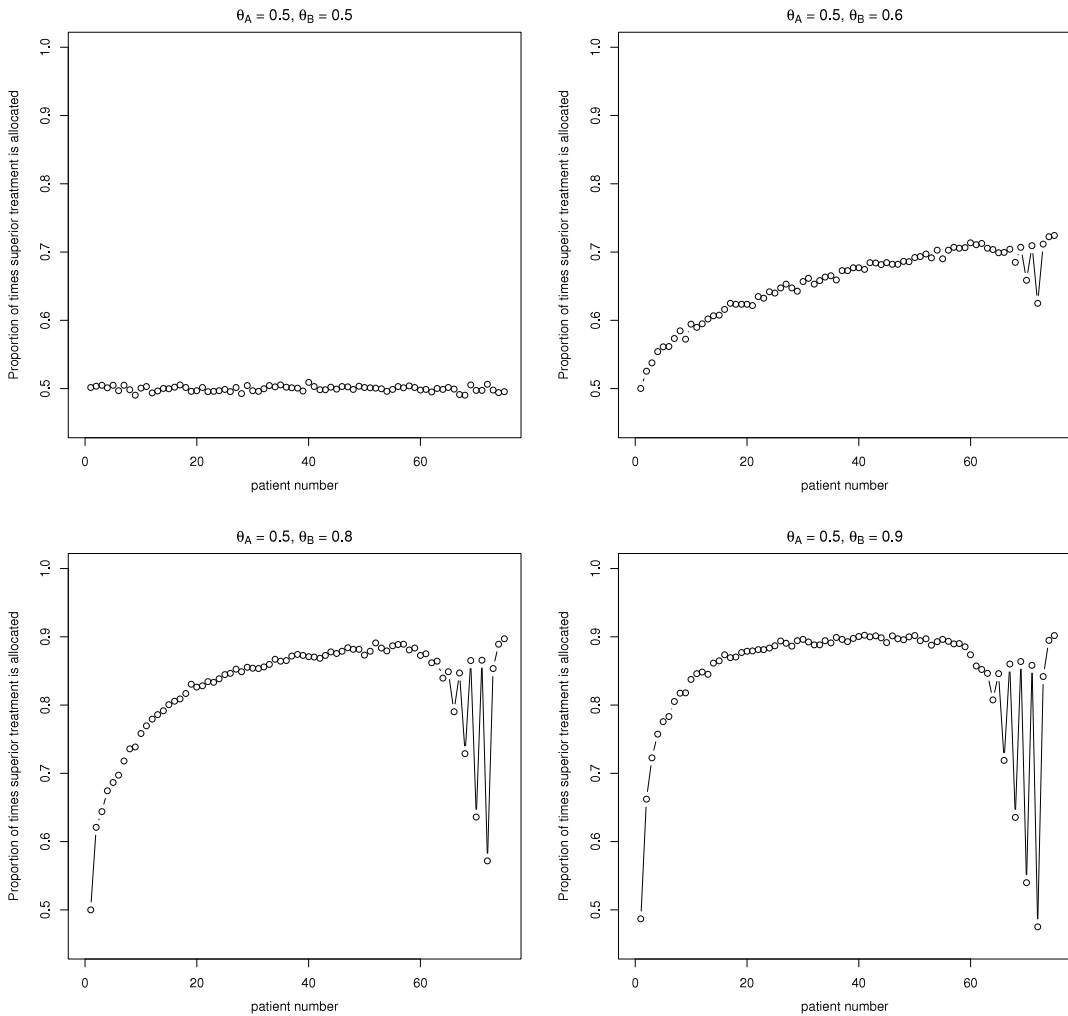

**Fig. A.9.** Probability of allocating a patient to treatment *B* for CRDP when  $\theta_A = 0.5$  and  $\theta_B = \{0.5, 0.6, 0.8, 0.9\}$  in a trial of size  $n = 75$  estimated over 10,000 simulations.

**Table A.4**

The effect of changing the degree of randomisation,  $p$ , on the performance measures when  $n = 75$ ,  $\theta_A = 0.2$  and  $\theta_B = 0.4$  for the RDP design (without the constraint).

| $p$ | Bias   | MSE   | Power | EPS   | % on superior |
|-----|--------|-------|-------|-------|---------------|
| 0.5 | -0.001 | 0.004 | 0.428 | 0.300 | 50.0          |
| 0.6 | -0.002 | 0.005 | 0.406 | 0.315 | 57.3          |
| 0.7 | -0.003 | 0.006 | 0.355 | 0.329 | 64.5          |
| 0.8 | -0.007 | 0.007 | 0.289 | 0.344 | 71.4          |
| 0.9 | -0.018 | 0.010 | 0.183 | 0.356 | 77.9          |
| 1.0 | -0.058 | 0.017 | 0.021 | 0.368 | 83.6          |

**Table A.5**

The effect of changing the degree of randomisation,  $p$ , on the performance measures when  $n = 75$ ,  $\theta_A = 0.2$  and  $\theta_B = 0.6$  for the RDP design (without the constraint).

| $p$ | Bias   | MSE   | Power | EPS   | % on superior |
|-----|--------|-------|-------|-------|---------------|
| 0.5 | -0.001 | 0.004 | 0.938 | 0.400 | 50.0          |
| 0.6 | -0.002 | 0.005 | 0.935 | 0.437 | 59.1          |
| 0.7 | -0.002 | 0.007 | 0.910 | 0.473 | 68.2          |
| 0.8 | -0.005 | 0.009 | 0.830 | 0.509 | 77.3          |
| 0.9 | -0.015 | 0.015 | 0.636 | 0.544 | 86.0          |
| 1.0 | -0.089 | 0.03  | 0.070 | 0.577 | 94.2          |



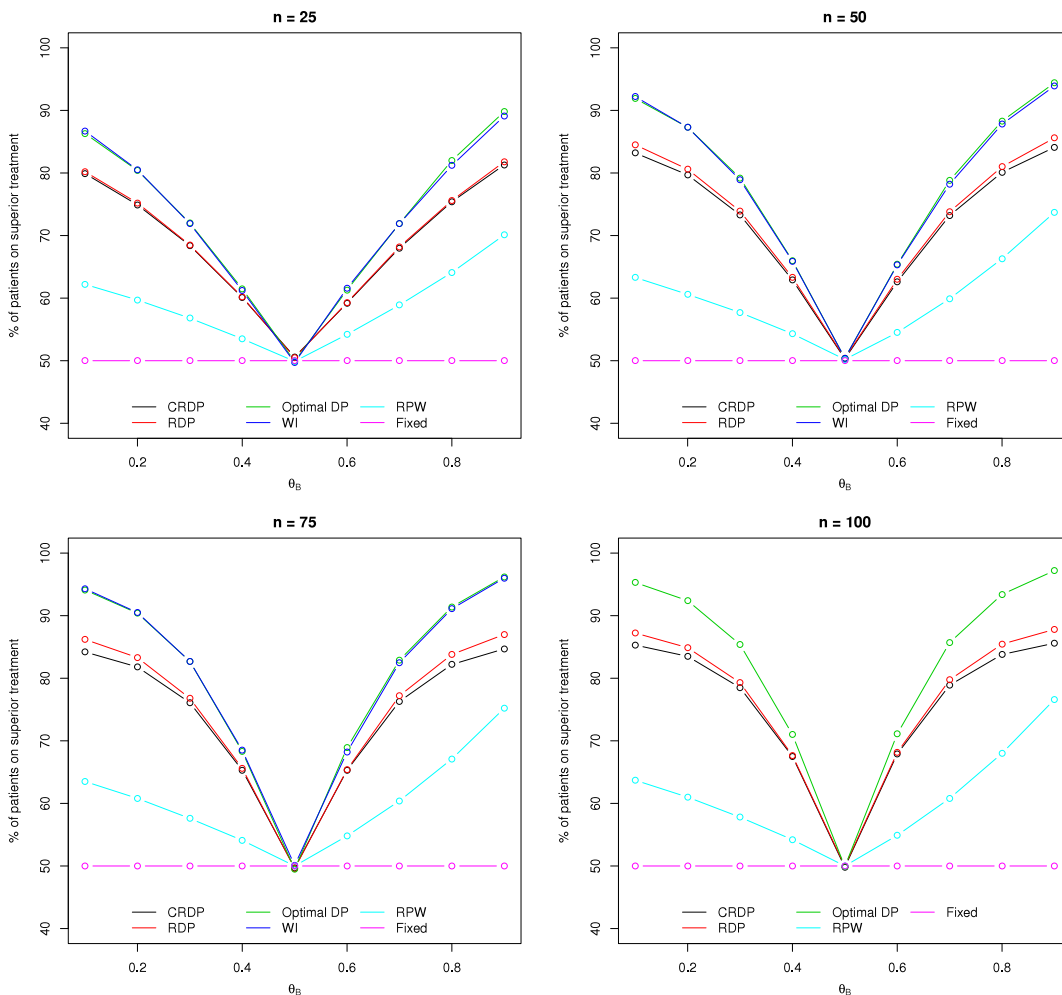

**Fig. A.11.** The percentage of patients on the superior treatment arm for each design when  $\theta_A = 0.5$  and  $\theta_B \in (0.1, 0.9)$  for varying sample sizes. Note that WI is not available for  $n = 100$  due to computational reasons.

**Table A.7**

The summary measures of performance in terms of the four key features. SDis: sum of the distance of each key feature from the best achievable value; MD: maximum difference among each of the key features from the best achievable value; SDev: sum of the deviations of each key feature from the fixed randomisation design.

| Design | SDis   | MD   | SDev    |
|--------|--------|------|---------|
| CRDP   | 32.925 | 24.7 | 53.513  |
| RDP    | 36.936 | 29.7 | 63.009  |
| DP     | 74.439 | 72.3 | 95.494  |
| WI     | 73.307 | 73.2 | 113.695 |
| RPW    | 30.714 | 29.7 | 11.801  |
| Fixed  | 40.512 | 50.0 | 0       |

maximum difference among each of the four key features from the best achievable value (MD), (iii) sum of the deviations of each key feature from the fixed randomisation design (SDev).

**A.6. Results for other sample sizes**

Figs. A.10–A.12 complement Figs. 1–3, respectively, to compare the performance of our proposed CRDP design with alternative designs for different sample sizes.

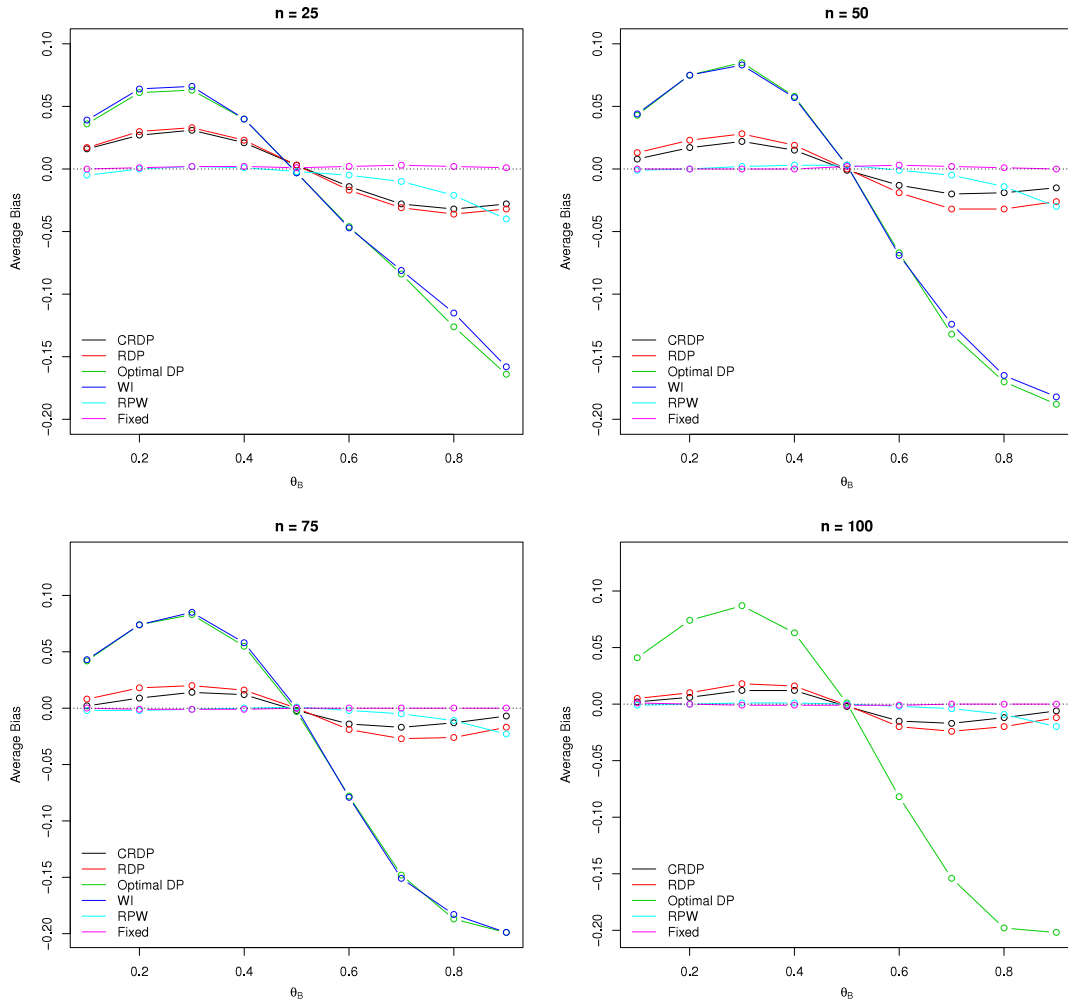

**Fig. A.12.** The average bias of the treatment effect estimator when  $\theta_A = 0.5$  and  $\theta_B \in (0.1, 0.9)$  for varying sample sizes. Note that WI is not available for  $n = 100$  due to computational reasons.
